# Supplementary material for: Seed-competent tau monomer initiates pathology in a tauopathy mouse model
Source: PubMed Central journal article supplement (PMC9307951; doi:10.1016/j.jbc.2022.102163), 2022-06-22

# SEC MW Standards

## A

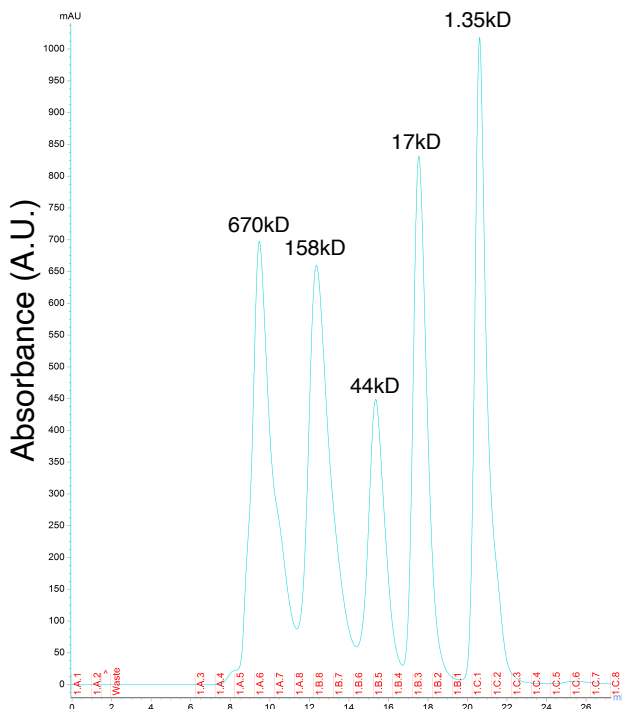

## B

### Mouse Brain Homogenate Fractionation

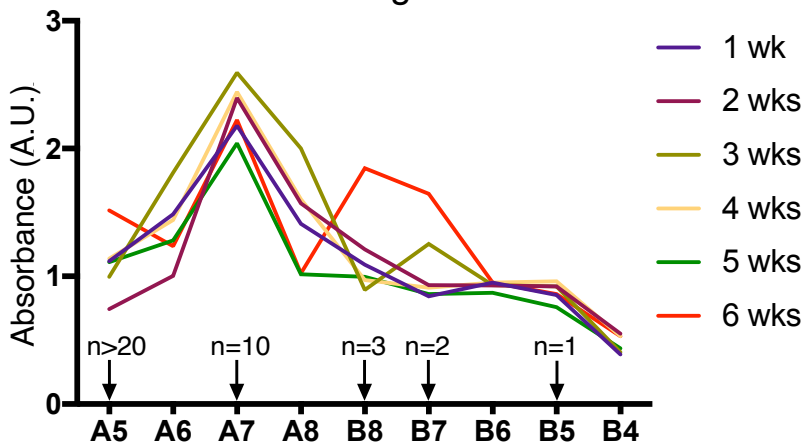

Supplement: mmc1.pdf [file mmc1.pdf]
