# Supplementary material for: Seed-competent tau monomer initiates pathology in a tauopathy mouse model
Source: PubMed Central journal article supplement (PMC9307951; doi:10.1016/j.jbc.2022.102163), 2022-06-22

**A**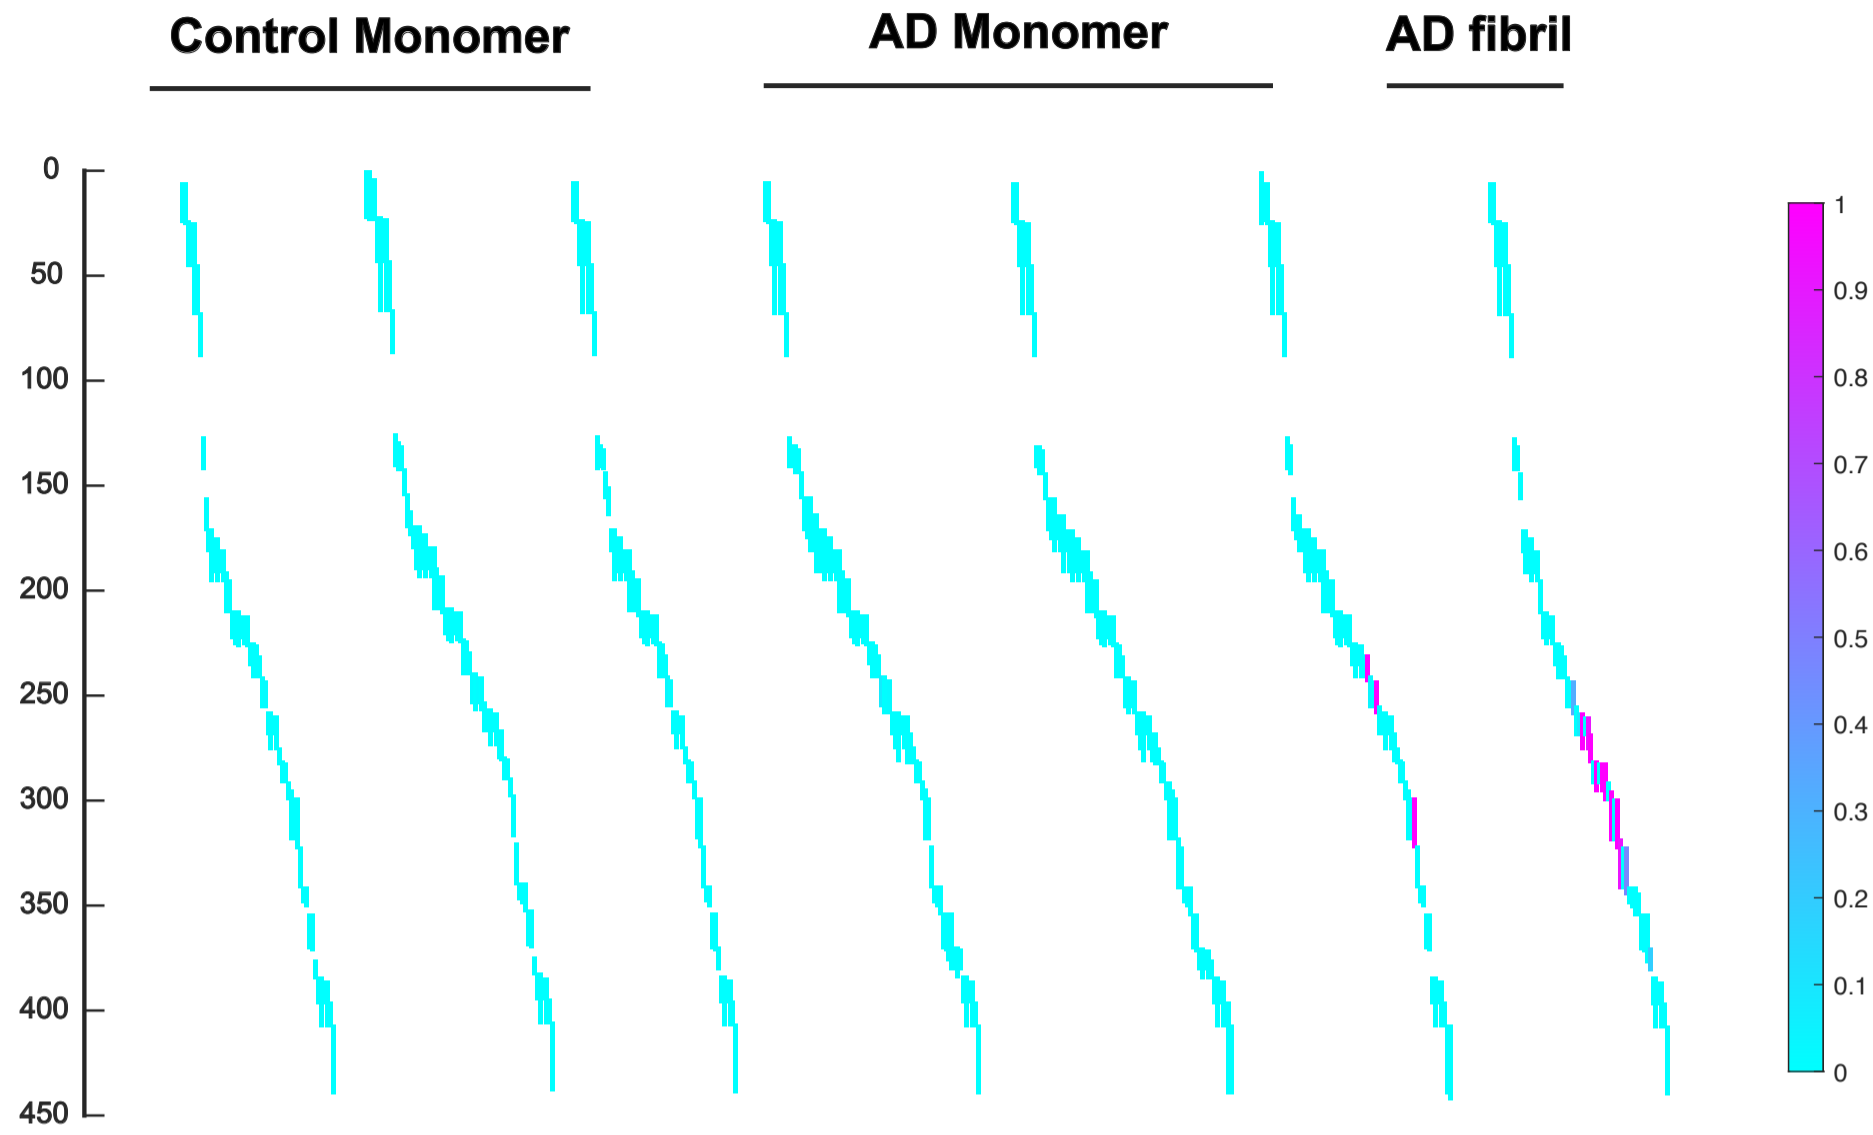**B****AD3 Monomer**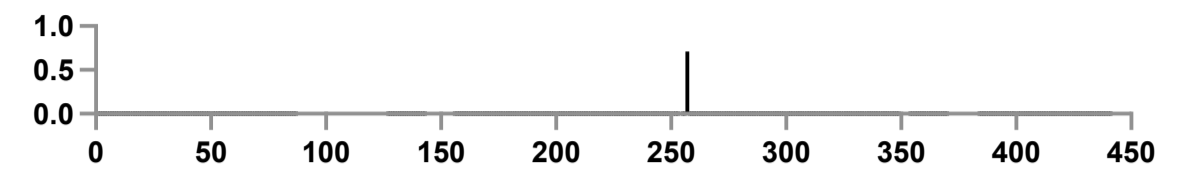

Supplement: mmc5.pdf [file mmc5.pdf]
